# Supplementary material
Source: Springer Nature journal article supplement (https://www.springermedizin.de/resource/supplementary/13054_2013_2977_MOESM3_ESM.pdf/9712296)
Supplement: MOESM3 [file 9712296]

601 records on initial search.

(382 papers on Pubmed , 217 on EMBASE, and 2 on Cochrane database for systematic reviews

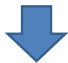

25 papers were selected for detailed review

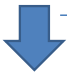

13 studies included in the final analysis

576 paper were excluded mostly for: No reference to ultrasound, reviews, editorials, no US or CXR comparison arms, retrospective studies, and duplicate studies.

12 papers were rejected mainly for issues in quality and inclusion criteria (eTable -1)
